# Supplementary material for: A Systematic Review of Short-Term Outcomes of Minimally Invasive Thoracoscopic Surgery for Lung Cancer after Neoadjuvant Systemic Therapy
Source: MDPI journal article supplement (doi:10.3390/cancers15153908), 2023-08-01
Supplement: s1 [file s1]

Supplemental Table S1: Complications per Study

| Author                | Year | Prolonged Air Leak N(%) |           | Arrhythmia N(%) |          | Pneumonia N(%) |          | Wound Infection N(%) |         | Cardiac Complication N(%) |         | Atelectasis N(%) |          | ARDS N(%) |         | Pneumothorax or effusion N(%) |         | Fistula N(%) |         | Empyema N(%) |         | Pulmonary Embolism N(%) |         | Respiratory Failure N(%) |         | Chylothorax N(%) |         |
|-----------------------|------|-------------------------|-----------|-----------------|----------|----------------|----------|----------------------|---------|---------------------------|---------|------------------|----------|-----------|---------|-------------------------------|---------|--------------|---------|--------------|---------|-------------------------|---------|--------------------------|---------|------------------|---------|
|                       |      | Open                    | VATS      | Open            | VATS     | Open           | VATS     | Open                 | VATS    | Open                      | VATS    | Open             | VATS     | Open      | VATS    | Open                          | VATS    | Open         | VATS    | Open         | VATS    | Open                    | VATS    | Open                     | VATS    | Open             | VATS    |
| Huang [12]            | 2013 | NR                      | 1 (2.4)   | NR              | NR       | NR             | NR       | NR                   | 1 (2.4) | NR                        | NR      | NR               | NR       | NR        | NR      | NR                            | NR      | NR           | NR      | NR           | NR      | NR                      | NR      | NR                       | 1 (2.4) | NR               | 1 (2.4) |
| Yang, C [16]          | 2016 | 6 (2.9)                 | 3 (4.3)   | 7 (3.4)         | 7 (10.1) | 4 (2.0)        | 2 (2.9)  | NR                   | NR      | NR                        | NR      | NR               | NR       | NR        | NR      | NR                            | NR      | NR           | NR      | NR           | NR      | NR                      | NR      | 1 (0.5)                  | 0 (0)   | NR               | NR      |
| Kamel [13]            | 2017 | NR                      | NR        | NR              | NR       | NR             | NR       | NR                   | NR      | 10 (13.5)                 | 1 (2.5) | NR               | NR       | NR        | NR      | NR                            | NR      | NR           | NR      | NR           | NR      | NR                      | NR      | NR                       | NR      | NR               | NR      |
| Jeon [19]             | 2018 | 4 (22.2)                | 2 (11.7)  | 4 (22.2)        | 3 (17.6) | 1 (5.5)        | 1 (5.9)  | 2 (11.1)             | 0 (0)   | NR                        | NR      | NR               | NR       | 1 (5.5)   | 1 (5.9) | NR                            | NR      | NR           | NR      | NR           | NR      | NR                      | 0 (0)   | 2 (11.8)                 | NR      | NR               | NR      |
| Yang, Z [15]          | 2018 | NR                      | 1 (3.4)   | NR              | NR       | NR             | NR       | NR                   | 1 (3.4) | NR                        | NR      | NR               | NR       | NR        | NR      | NR                            | NR      | NR           | NR      | NR           | NR      | NR                      | NR      | NR                       | NR      | NR               | NR      |
| Cabanero sanchez [25] | 2022 | 18 (13.3)               | 7 (9.5)   | 13 (9.6)        | 2 (2.7)  | 9 (6.6)        | 1 (1.3)  | 5 (3.7)              | 0 (0)   | NR                        | NR      | NR               | 8 (5.9)  | 2 (2.7)   | 1 (0.7) | 0 (0)                         | 2 (1.5) | 0 (0)        | 1 (0.7) | 0 (0)        | 2 (1.5) | 0 (0)                   | 1 (0.7) | 0 (0)                    | NR      | NR               |         |
| DeL'Amore[26]         | 2022 | 19 (20.4)               | 11 (17.7) | NR              | NR       | NR             | NR       | NR                   | NR      | NR                        | NR      | NR               | NR       | NR        | NR      | NR                            | NR      | NR           | NR      | NR           | NR      | NR                      | NR      | NR                       | NR      | NR               | NR      |
| Jeon [28]             | 2022 | 3 (0.8)                 | 0 (0)     | 12 (3.4)        | 8 (22.8) | 4 (1.1)        | 1 (2.8)  | 1 (0.3)              | 0 (0)   | NR                        | NR      | 2 (0.6)          | 2 (5.7)  | 8 (2.3)   | 1 (2.8) | NR                            | NR      | NR           | NR      | NR           | 1 (0.3) | 1 (2.8)                 | NR      | NR                       | NR      | NR               | 3 (0.8) |
| Tian [30]             | 2022 | 4 (5.6)                 | 3 (5.4)   | 0 (0)           | 1 (1.7)  | 4 (5.6)        | 0 (0)    | NR                   | NR      | 1 (1.4)                   | 0 (0)   | 0 (0)            | 1 (1.8)  | NR        | NR      | NR                            | NR      | NR           | NR      | NR           | NR      | NR                      | 0 (0)   | 1 (1.8)                  | NR      | NR               | NR      |
| Tong [31]             | 2022 | NR                      | 4 (22.2)  | NR              | 6 (33.3) | NR             | 1 ( 5.5) | NR                   | 1 (5.5) | NR                        | NR      | NR               | 3 (16.7) | NR        | NR      | NR                            | NR      | NR           | NR      | NR           | NR      | 1 (5.5)                 | NR      | 1 (5.5)                  | NR      | NR               | NR      |
| Yao [32]              | 2022 | NR                      | 2 (18.2)  | NR              | 1 (9.0)  | NR             | 1 (9.0)  | NR                   | NR      | NR                        | NR      | NR               | NR       | NR        | NR      | NR                            | NR      | NR           | NR      | NR           | NR      | NR                      | NR      | NR                       | NR      | NR               | NR      |
| Zhang [33]            | 2022 | 1 (1.3)                 | 5 (9.4)   | 3 (3.8)         | 1 (1.9)  | 8 (10.2)       | 2 (3.8)  | NR                   | NR      | NR                        | NR      | NR               | NR       | NR        | NR      | NR                            | NR      | NR           | NR      | NR           | NR      | NR                      | NR      | NR                       | 2 (2.6) | 0 (0)            | 1 (1.3) |

VATS = video assisted thoracoscopic surgery, ARDS= acute respiratory distress syndrome, NR= not reported.
